# Supplementary material for: Benzimidazole-modified organosilane functionalized silica nanoparticles as a ‘turn-off’ fluorescent probe for highly selective Cu2+ ion detection: unravelling logic gate behaviour and molecular docking studies
Source: Royal Society of Chemistry journal article supplement (doi:10.1039/d3nj05199d), 2023-12-22
Supplement: d3nj05199d1.pdf [file d3nj05199d1.pdf]

## Benzimidazole-Modified Organosilane: A 'Turn-off' Fluorescent Probe for Highly Selective Cu<sup>2+</sup> Ion Detection - Unravelling Logic Gate Behaviour and Molecular Docking Studies

Gurjaspreet Singh<sup>a\*</sup>, Mohit<sup>a\*</sup>, Akshpreet Singh<sup>b</sup>, Priyanka<sup>a</sup>, Sumesh Khurana<sup>a</sup>, Mithun<sup>a</sup>, K. N. Singh<sup>a</sup>, Jasamrit Nayyar<sup>c</sup>, Brij Mohan<sup>d\*</sup>,

<sup>a</sup>Department of Chemistry, Panjab University, Chandigarh, 160014, India

<sup>b</sup>Department of Chemistry, DAV College, Sector-10, Chandigarh, India

<sup>c</sup>Department of Chemistry, GGSDS College, Sector-32 C, Chandigarh, 160014, India

<sup>d</sup>Centro de Química Estrutural, Institute of Molecular Sciences, Instituto Superior Técnico, Universidade de Lisboa, Av. Rovisco Pais, 1049-001 Lisboa, Portugal

Email: [gjsingh@pu.ac.in](mailto:gjsingh@pu.ac.in), [monukalyan31@gmail.com](mailto:monukalyan31@gmail.com), [brizharry17@gmail.com](mailto:brizharry17@gmail.com)

| Entry                                                                                            | Page No. |
|--------------------------------------------------------------------------------------------------|----------|
| <sup>1</sup> H NMR spectrum of compound 4 (Fig.S1)                                               | 2        |
| <sup>1</sup> H NMR spectrum of compound 5 (Fig.S2)                                               | 2        |
| <sup>13</sup> C NMR spectrum of compound 5 (Fig.S3)                                              | 3        |
| Mass spectrum of compound 5 (Fig.S4)                                                             | 3        |
| TGA curves for Silane and H-NPs (Fig.S5)                                                         | 4        |
| XRD of H-NPs (a) EDX pattern of H-NPs (b) (Fig.S6)                                               | 4        |
| Job's plot for compound (5) (Fig. S7)                                                            | 5        |
| B-H curve for compound 5 (a) B-H curve for H-NPs (b) (Fig.S8)                                    | 5        |
| Interference study of ligand (5) + Cu <sup>2+</sup> in the presence of other metal ions (Fig.S9) | 6        |
| Time response study of compound (5) (Fig. S10)                                                   | 6        |
| pH dependence study of compound (5) (Fig. S11)                                                   | 7        |
| NMR spectra of 5 (b) and complex (a) (Fig. S12)                                                  | 7        |
| Modification of silica surfaces with silane 5 (Scheme S1)                                        | 8        |
| Synthesis of complex (Scheme S2)                                                                 | 8        |

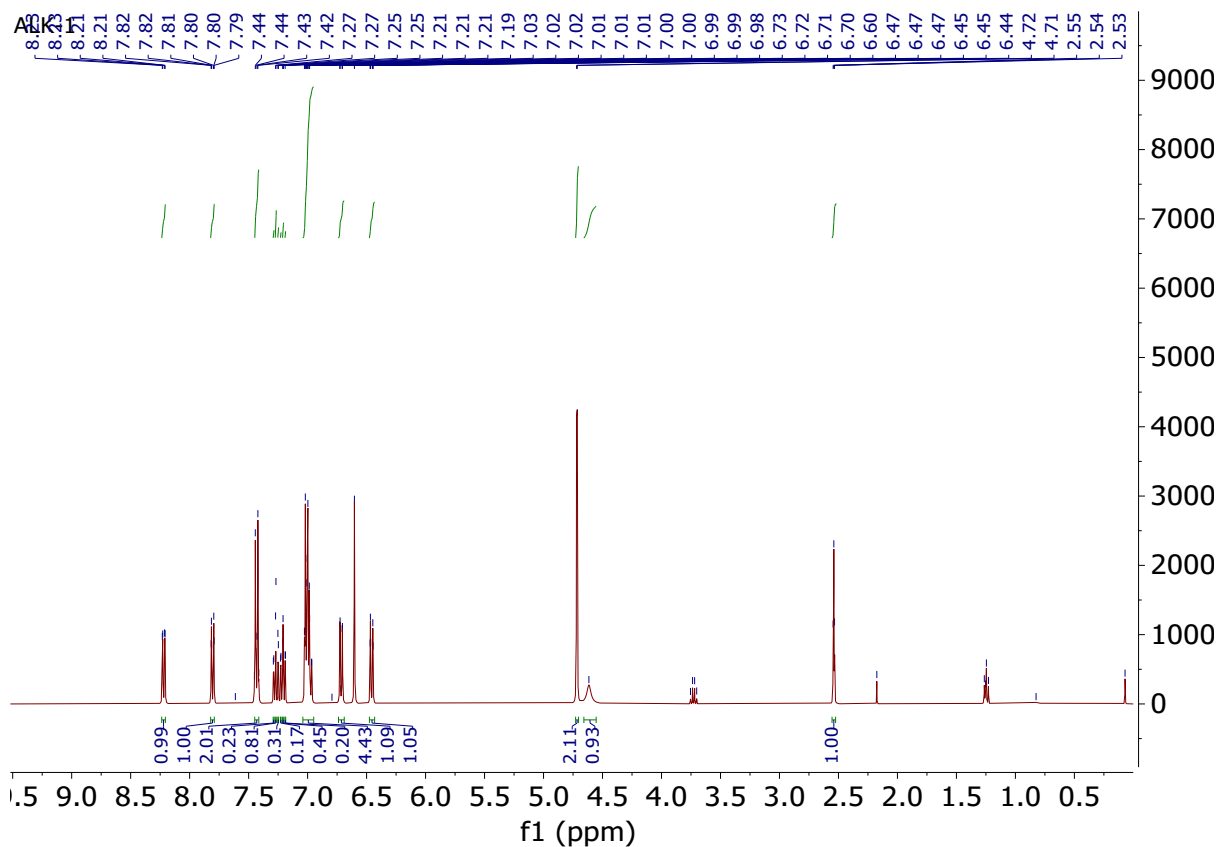

Fig.S1  $^1\text{H}$  NMR spectrum of compound 4

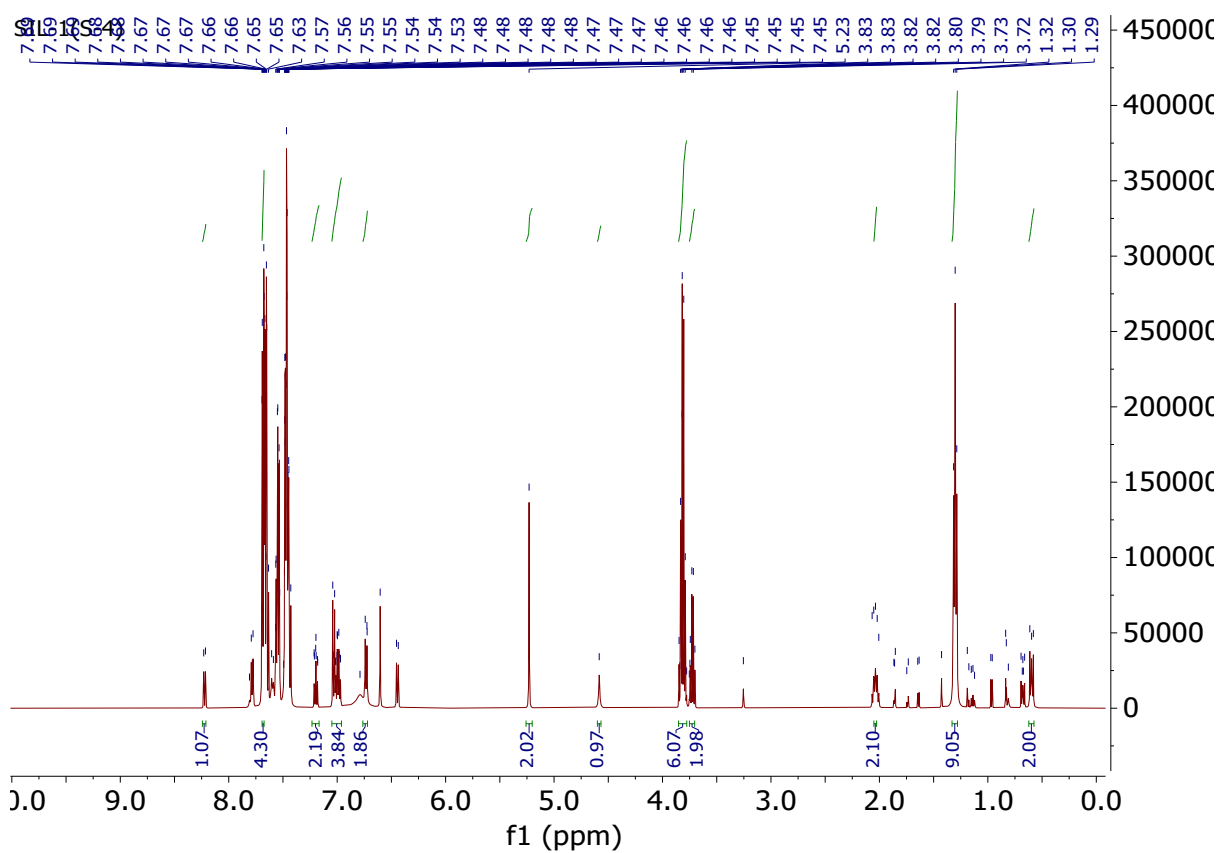

Fig.S2  $^1\text{H}$  NMR spectrum of compound 5

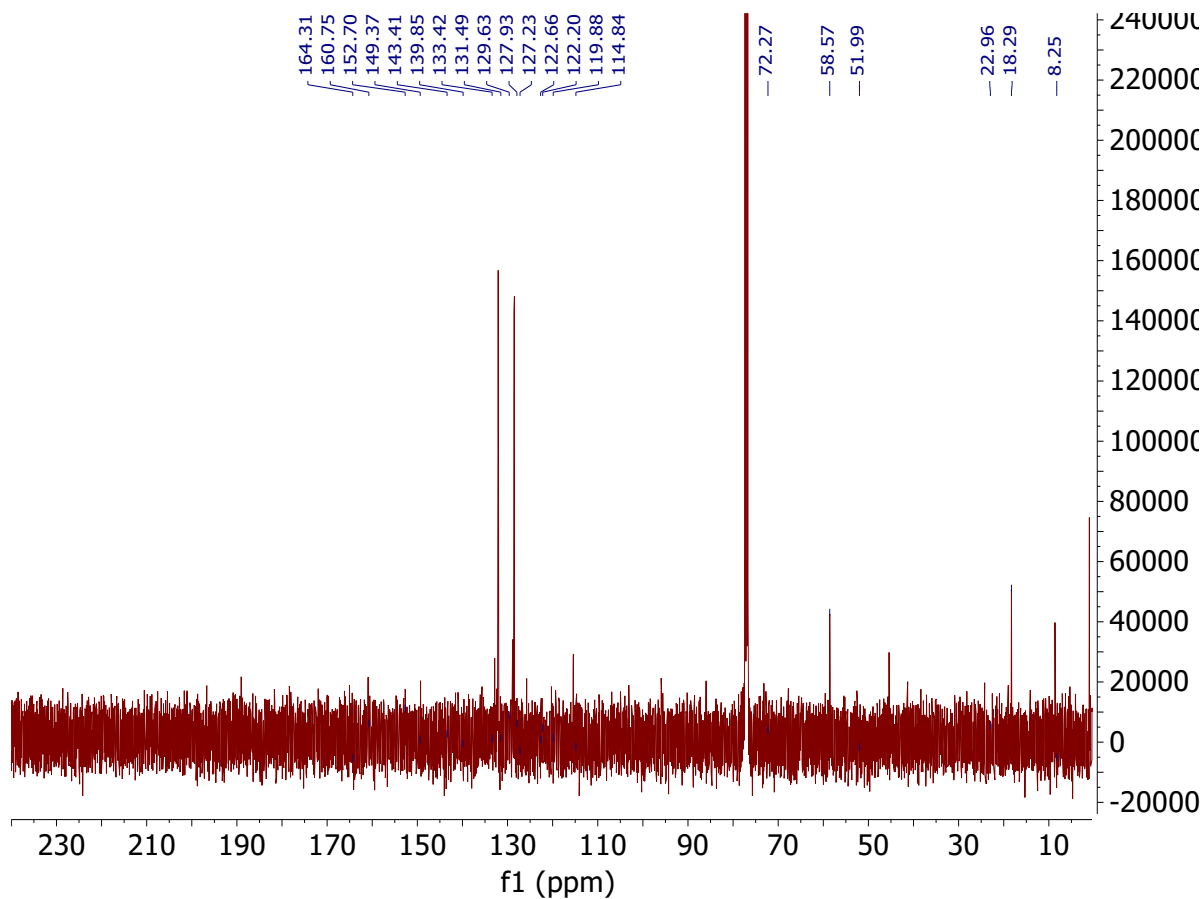

Fig.S3  $^{13}\text{C}$  NMR spectrum of compound 5

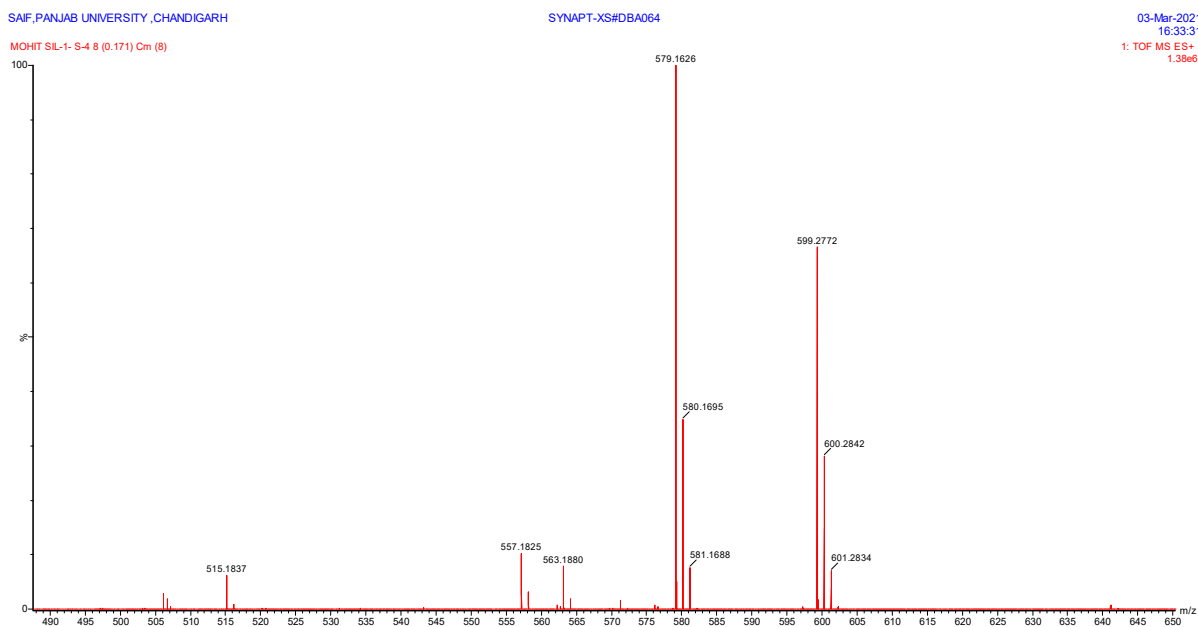

Fig.S4 Mass spectrum of compound 5

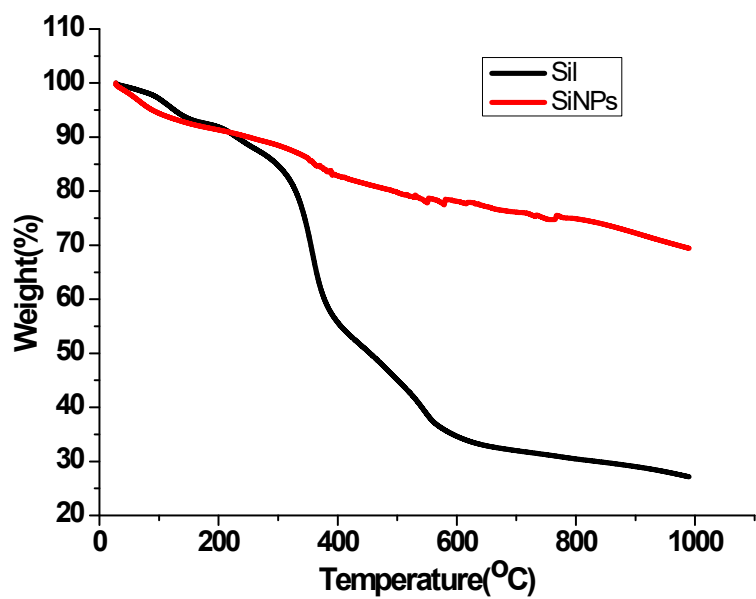

Fig. S5: TGA curves for Silane and H-NPs

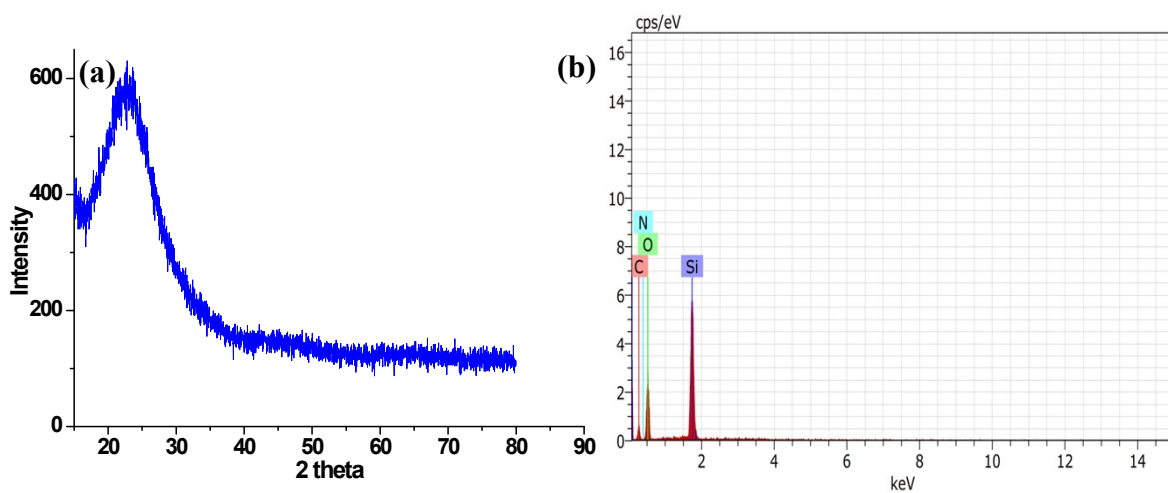

Fig. S6: XRD of H-NPs @ EDX pattern of H-NPs (b)

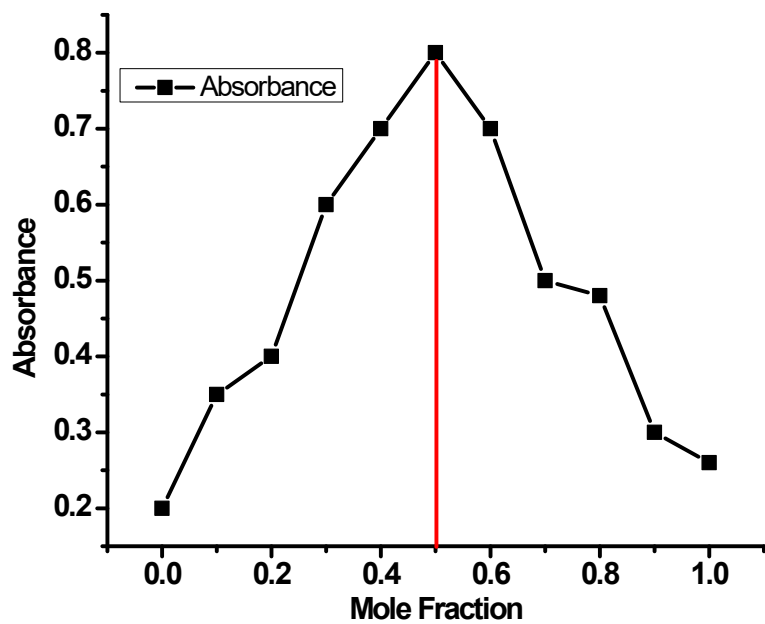

Fig. S7: Job's plot for compound (5)

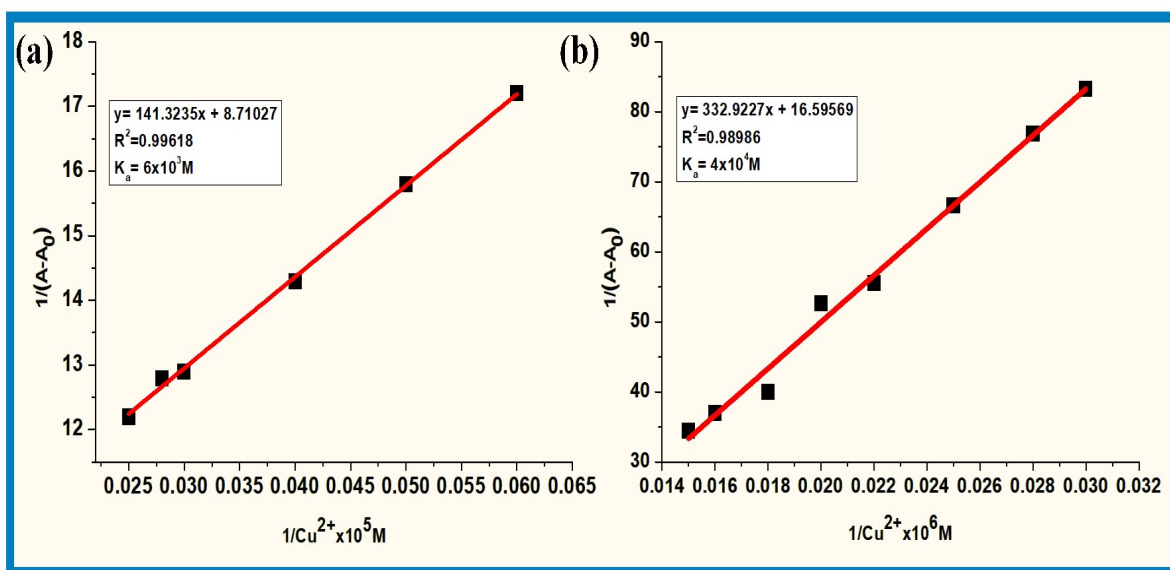

Fig S8: B-H curve for compound 5a (a) B-H curve for H-NPs (b)

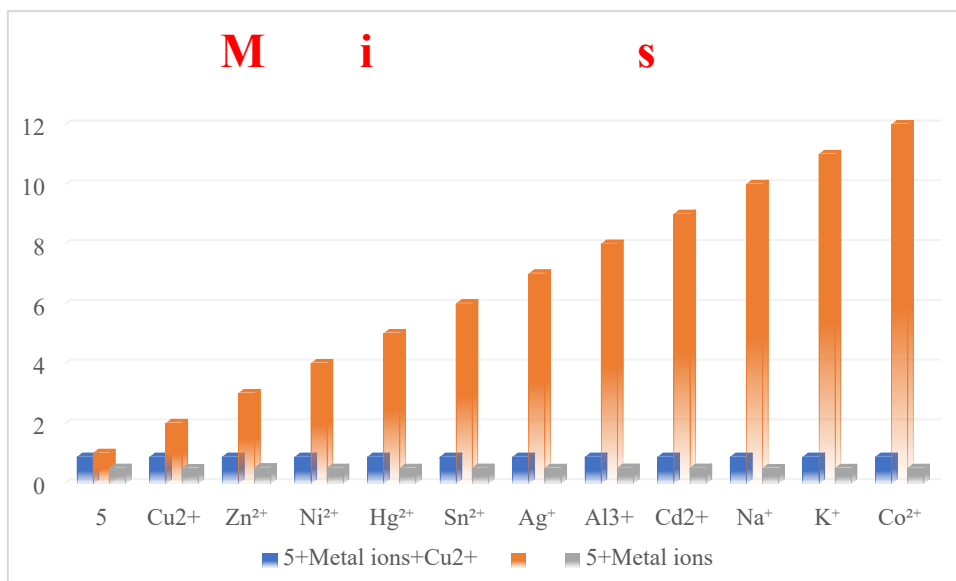

**Fig S9:** Interference study of ligand(5a) + Cu<sup>2+</sup> in the presence of other metal ions

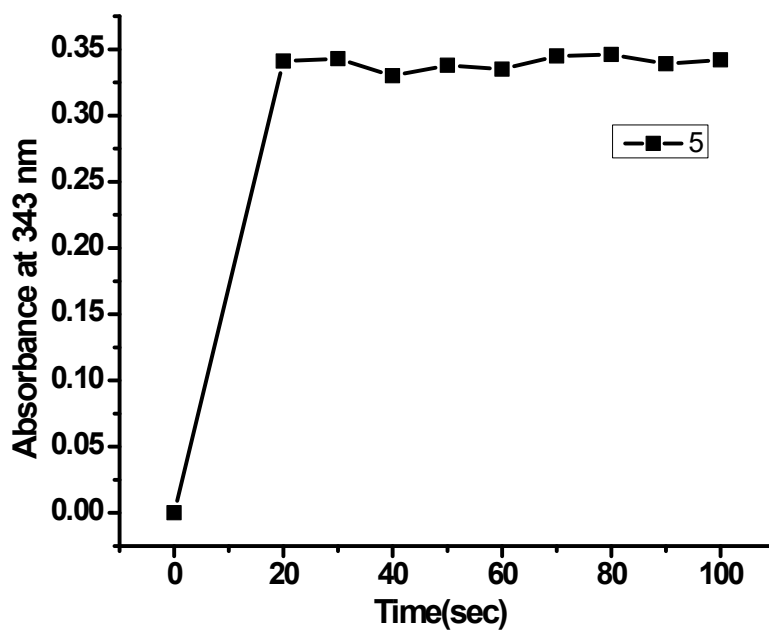

**Fig S10:** Time response study of compound (5)

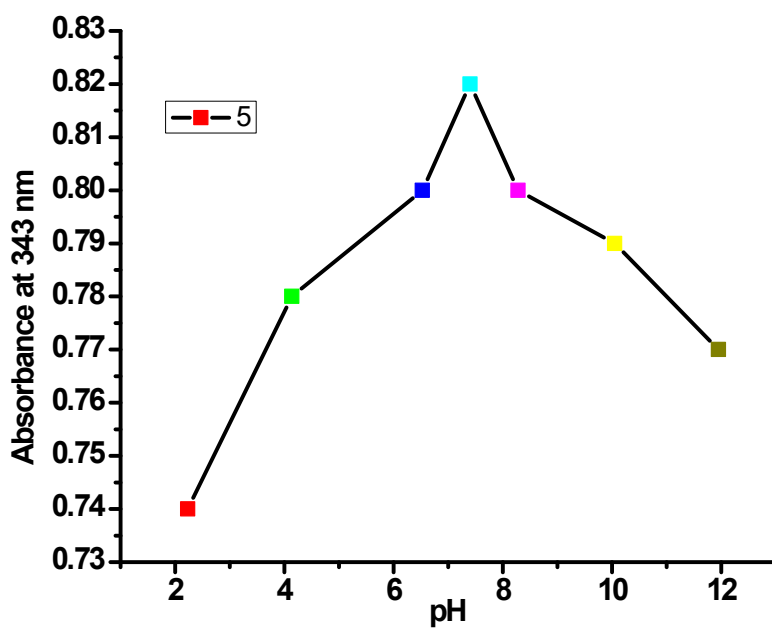

Fig S11: pH dependence study of compound (5)

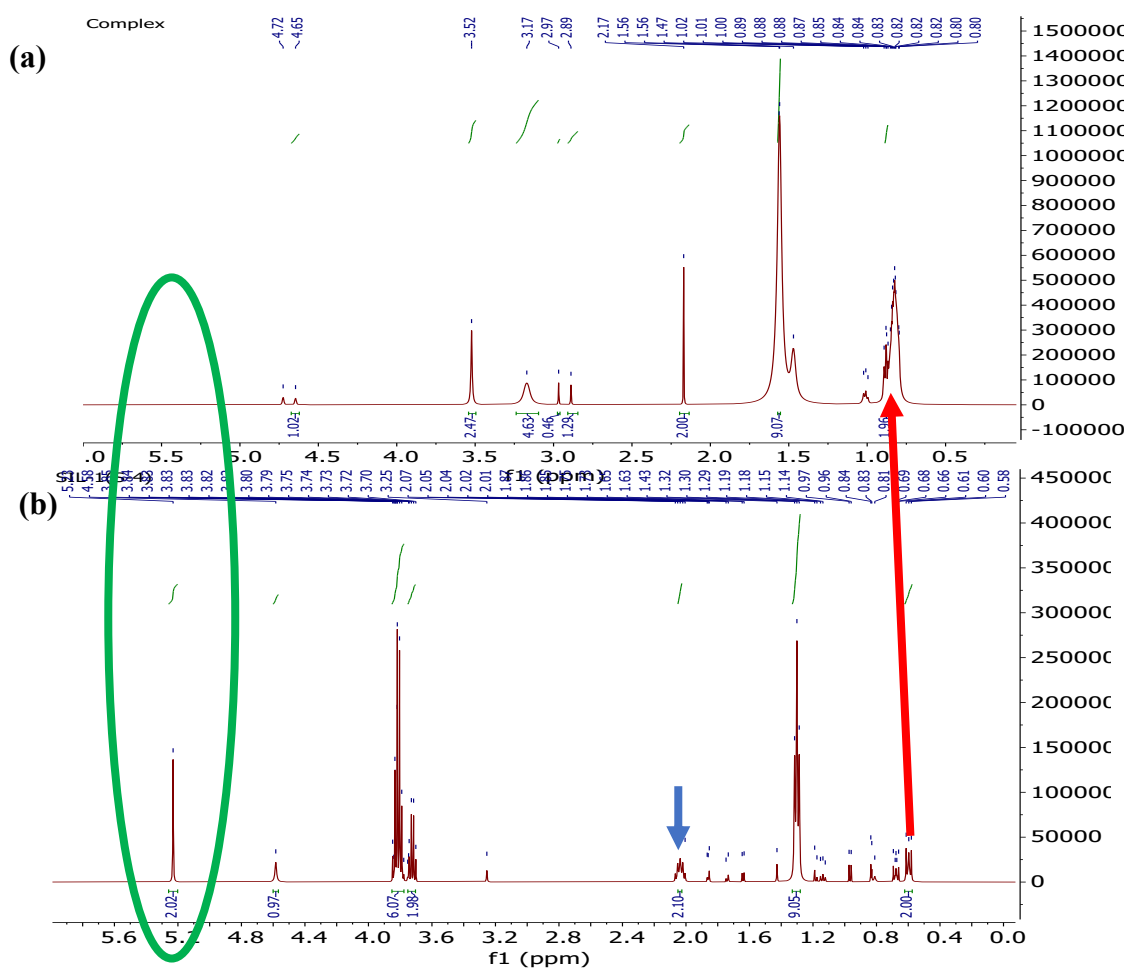

Fig. S12: NMR spectra of 5 (b) and complex (a)

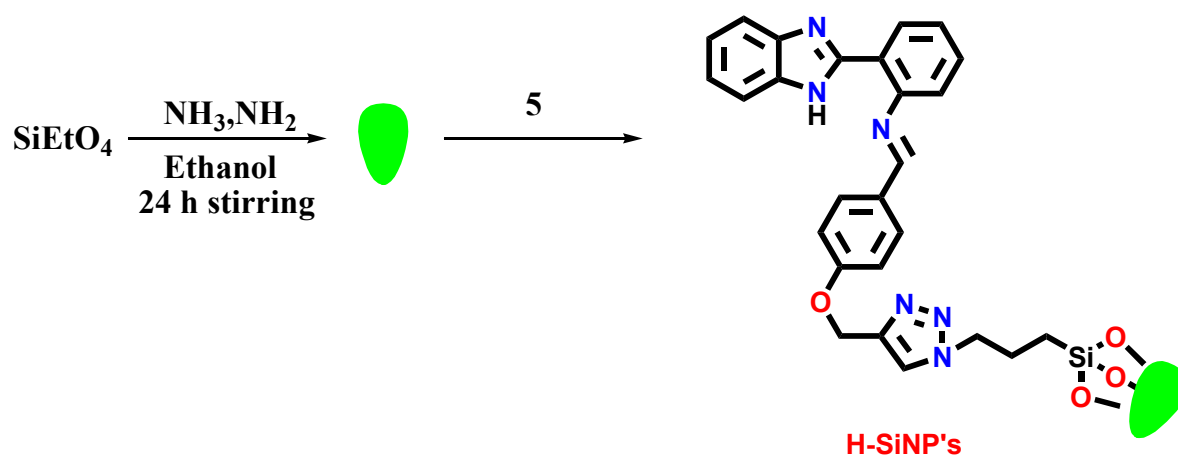

**Scheme S1:** Modification of silica surfaces with silane 5

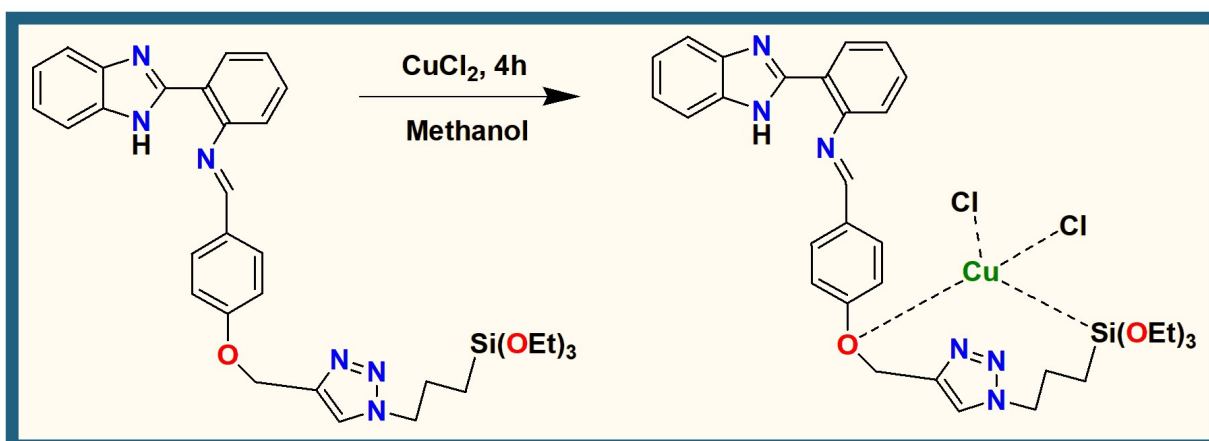

**Scheme S2:** Synthesis of complex
